# Supplementary material for: Multi-omic machine learning predictor of breast cancer therapy response
Source: PubMed Central journal article supplement (PMC8791834; doi:10.1038/s41586-021-04278-5), 2021-12-07
Supplement: 41586_2021_4278_MOESM1_ESM.pdf [file 41586_2021_4278_MOESM1_ESM.pdf]

**Supplementary information**

---

**Multi-omic machine learning predictor of breast cancer therapy response**

---

In the format provided by the authors and unedited

## Supplementary Methods: Machine Learning Model Specifics

### 1. Software versions and model parameters

Models were developed in a well-defined environment within a Singularity container (v. 2.4.6-dist). The following software versions were used:

- Python 3.7.4
- Numpy 1.16.4
- Scipy 1.3
- Scikit-learn 0.21.2
- Pandas 0.24.2

To maximise the robustness of the predictions, the models contain two levels of averaging. Firstly, predictions are obtained by averaging three classifier pipelines, as follows:

$$Prob(\text{attaining } pCR) = \frac{1}{3} \times (Pipeline_{LR}^{HER2+} + Pipeline_{SVC}^{HER2+} + Pipeline_{RF}^{HER2+}),$$

where

$$Pipeline_{Classifier} = \{Coll.Reduction(0.8) \Rightarrow Univ.selection \Rightarrow Classifier\},$$

with the corresponding hyperparameters listed in Tables 1 and 2. In particular, model hyperparameters that were *fixed a priori* are listed in Table 1, while model hyperparameters that were *optimised* for each of the classifiers using a 5-fold cross-validation setup are listed in Table 3. Once all hyperparameters are set, the model is re-trained on the entire training cohort, and subsequently frozen.

Secondly, to account for possible biases in the optimisation due to the particular cross validation splitting used, we repeated the process explained above 5 times, with 5 different cross-validation splitting seeds (integers from 1 to 5). As a result, we obtain 5 alternative optimised models. The final predictions are the average of the 5.

We trained several versions of the models with increasing numbers of integrated features. Table 2 lists all the feature combinations studied. Each model version was trained independently from all the others. We sometimes refer to the model trained with all available features as the “fully integrated” model.

| Classifier    | Non-optimised hyperparameters                                                                                                                                                                                                |
|---------------|------------------------------------------------------------------------------------------------------------------------------------------------------------------------------------------------------------------------------|
| Random Forest | bootstrap=True, class_weight=None, criterion='gini', max_leaf_nodes=None, min_impurity_decrease=0.0, min_impurity_split=None, min_samples_leaf=1, min_weight_fraction_leaf=0.0, n_jobs=None, oob_score=False, random_state=1 |
| SVC           | cache_size=200, class_weight=None, coef0=0.0, decision_function_shape='ovr', degree=3, max_iter=-1, probability=False, random_state=1, shrinking=True, tol=0.001                                                             |

|                     |                                                                                                                                                                                                            |
|---------------------|------------------------------------------------------------------------------------------------------------------------------------------------------------------------------------------------------------|
| Logistic Regression | class_weight=None, dual=False, fit_intercept=True, intercept_scaling=1, max_iter=10000, multi_class='warn', n_jobs=None, penalty='elasticnet', random_state=1, solver='saga', tol=0.0001, warm_start=False |
|---------------------|------------------------------------------------------------------------------------------------------------------------------------------------------------------------------------------------------------|

**Table 1.** List of non-optimised classifier hyperparameters.

| Model num. | Clinical | DNA | RNA | Digital Pathology | Treatment |
|------------|----------|-----|-----|-------------------|-----------|
| 1          | x        |     |     |                   |           |
| 2          | x        | x   |     |                   |           |
| 3          | x        |     | x   |                   |           |
| 4          | x        | x   | x   |                   |           |
| 5          | x        | x   | x   | x                 |           |
| 6          | x        | x   | x   | x                 | x         |

**Table 2.** List of all the trained models depending on features used.

## 2. Features selected after dimensionality reduction steps

The modelling pipeline includes two steps of dimensionality reduction before classification, namely collinearity reduction and univariable feature selection. Collinearity reduction acts by removing features correlated by over 0.8 (Spearman correlation). The univariable feature selection step acts by keeping only the  $k$  best features in terms of their predictive power. This number  $k$  is set during the optimization process.

The lists of features that result from the two-step dimensionality reduction process in each of the model pipelines are displayed in Tables 4 to 9.

## 3. Logistic regression coefficients

We estimated feature importances by dropping one feature at a time and re-calculating the cross-validation AUC, as explained in the main body of the manuscript. This approach is general enough to be applicable to all algorithms.

To provide further insights into the features driving the prediction, Tables 10 to 15 contain the logistic regression coefficients for each of the models, as well as the mean and standard deviation values used to z-score normalise the features.

| Seed | Features                            | Logistic Regression pipeline |       |          | Random Forest pipeline |            |               |                    |                 | Support Vector Machine pipeline |          |          |         |
|------|-------------------------------------|------------------------------|-------|----------|------------------------|------------|---------------|--------------------|-----------------|---------------------------------|----------|----------|---------|
|      |                                     | K Best                       | C     | L1 ratio | K Best                 | Max. depth | Max. features | Min. samples split | Num. estimators | K Best                          | C        | Gamma    | Kernel  |
| 1    | Clinical                            | 6                            | 0.045 | 0.1      | 6                      | 3          | 0.2           | 6                  | 50              | 4                               | 0.086    | 6.02E-08 | sigmoid |
| 2    | Clinical                            | 4                            | 0.028 | 0.1      | 4                      | None       | 0.7           | 15                 | 5               | 4                               | 0.017    | 0.001124 | linear  |
| 3    | Clinical                            | 6                            | 0.073 | 0.1      | 6                      | 3          | 0.7           | 10                 | 10              | 4                               | 0.034    | 6.02E-08 | rbf     |
| 4    | Clinical                            | 4                            | 0.045 | 0.2      | 4                      | 3          | 0.05          | 12                 | 10              | 4                               | 0.276    | 8.90E-09 | rbf     |
| 5    | Clinical                            | 5                            | 0.017 | 0.1      | 5                      | None       | 0.2           | 15                 | 10              | 4                               | 60.209   | 5.36E-07 | rbf     |
| 1    | Clin. + DNA                         | 14                           | 0.117 | 0.1      | 14                     | None       | 0.1           | 12                 | 50              | 13                              | 1.421    | 1.87E-05 | rbf     |
| 2    | Clin. + DNA                         | 7                            | 0.045 | 0.1      | all                    | None       | 0.1           | 12                 | 50              | 8                               | 0.137    | 0.001941 | sigmoid |
| 3    | Clin. + DNA                         | 14                           | 0.788 | 0.8      | 14                     | 3          | 0.1           | 15                 | 50              | 14                              | 11.690   | 0.004406 | rbf     |
| 4    | Clin. + DNA                         | all                          | 0.045 | 0.1      | 12                     | None       | 0.2           | 15                 | 10              | 11                              | 0.005    | 2.27E-09 | rbf     |
| 5    | Clin. + DNA                         | all                          | 0.489 | 0.2      | all                    | 3          | 0.2           | 10                 | 10              | all                             | 11.690   | 0.004406 | rbf     |
| 1    | Clin. + RNA                         | 13                           | 0.073 | 0.1      | 13                     | 3          | 0.05          | 2                  | 50              | 10                              | 14.774   | 1.17E-08 | rbf     |
| 2    | Clin. + RNA                         | all                          | 0.117 | 0.1      | 3                      | None       | 0.05          | 6                  | 10              | 10                              | 1.421    | 1.00E-09 | rbf     |
| 3    | Clin. + RNA                         | 13                           | 0.073 | 0.1      | all                    | None       | 0.05          | 10                 | 10              | 13                              | 18.672   | 1.73E-09 | rbf     |
| 4    | Clin. + RNA                         | 10                           | 0.028 | 0.1      | 13                     | None       | 0.05          | 10                 | 25              | 11                              | 0.108    | 4.58E-08 | rbf     |
| 5    | Clin. + RNA                         | 13                           | 0.028 | 0.1      | 13                     | 3          | 0.1           | 3                  | 50              | 9                               | 0.003    | 0.001124 | rbf     |
| 1    | Clin. + DNA + RNA                   | 20                           | 0.189 | 0.1      | all                    | None       | 0.05          | 2                  | 100             | all                             | 1000.000 | 1.31E-09 | rbf     |
| 2    | Clin. + DNA + RNA                   | 20                           | 0.045 | 0.1      | 18                     | 3          | 0.05          | 12                 | 25              | 14                              | 0.108    | 6.02E-08 | rbf     |
| 3    | Clin. + DNA + RNA                   | 15                           | 0.189 | 0.1      | all                    | None       | 0.05          | 6                  | 100             | 13                              | 245.375  | 6.02E-08 | rbf     |
| 4    | Clin. + DNA + RNA                   | all                          | 0.189 | 0.1      | all                    | 3          | 0.05          | 10                 | 10              | all                             | 2.270    | 1.00E-09 | rbf     |
| 5    | Clin. + DNA + RNA                   | all                          | 0.045 | 0.1      | all                    | None       | 0.2           | 15                 | 10              | 14                              | 5.790    | 1.80E-07 | rbf     |
| 1    | Clin. + DNA + RNA + DigPath         | 21                           | 0.189 | 0.2      | 19                     | None       | 0.2           | 6                  | 10              | 15                              | 0.013    | 5.15E-09 | rbf     |
| 2    | Clin. + DNA + RNA + DigPath         | all                          | 0.045 | 0.1      | all                    | None       | 0.05          | 3                  | 50              | 14                              | 1.124    | 1.54E-08 | rbf     |
| 3    | Clin. + DNA + RNA + DigPath         | 18                           | 0.304 | 0.6      | 10                     | 3          | 0.7           | 3                  | 25              | 16                              | 18.672   | 6.26E-06 | rbf     |
| 4    | Clin. + DNA + RNA + DigPath         | all                          | 2.043 | 0.1      | 9                      | 3          | 0.7           | 10                 | 50              | 20                              | 76.095   | 1.00E-09 | rbf     |
| 5    | Clin. + DNA + RNA + DigPath         | all                          | 0.073 | 0.1      | 21                     | None       | 0.05          | 6                  | 50              | 16                              | 0.002    | 0.001941 | rbf     |
| 1    | Clin. + DNA + RNA + DigPath + Chemo | 21                           | 0.304 | 0.3      | all                    | None       | 0.05          | 6                  | 100             | 15                              | 0.013    | 5.15E-09 | rbf     |
| 2    | Clin. + DNA + RNA + DigPath + Chemo | 22                           | 0.045 | 0.1      | 25                     | None       | 0.05          | 12                 | 25              | 14                              | 3.625    | 1.08E-05 | rbf     |
| 3    | Clin. + DNA + RNA + DigPath + Chemo | 15                           | 0.073 | 0.1      | all                    | None       | 0.7           | 2                  | 25              | 16                              | 18.672   | 6.26E-06 | rbf     |
| 4    | Clin. + DNA + RNA + DigPath + Chemo | 23                           | 1.269 | 0.1      | all                    | None       | 0.1           | 6                  | 25              | 24                              | 153.617  | 1.00E-09 | rbf     |
| 5    | Clin. + DNA + RNA + DigPath + Chemo | 23                           | 0.073 | 0.3      | all                    | 3          | 0.7           | 6                  | 10              | all                             | 0.003    | 1.00E-09 | rbf     |

Table 3. Optimised hyperparameters used in each of the three model pipelines (rbf: radial basis function)





|                                 |   |   |   |   |   |   |   |   |   |   |   |   |   |   |   |
|---------------------------------|---|---|---|---|---|---|---|---|---|---|---|---|---|---|---|
| <b>HRD score</b>                | x | x | x | x | x | x | x | x | x | x | x | x | x | x | x |
| <b>Neoantigen burden</b>        | x | x |   | x | x | x | x |   |   | x |   |   |   |   | x |
| <b>STAT1 score</b>              | x | x | x | x | x | x | x | x |   | x | x | x | x | x | x |
| <b>Lymphocyte density</b>       | x | x | x | x | x | x | x | x | x | x | x | x | x | x | x |
| <b>LOH HLA</b>                  | x | x | x | x | x | x | x |   |   | x |   |   |   |   | x |
| <b>T-cell dysfunction score</b> |   | x |   | x | x |   | x |   |   |   |   |   |   |   |   |
| <b>T-Cell exclusion score</b>   | x | x | x | x | x | x | x |   |   | x | x | x | x | x | x |
| <b>Mast cell score</b>          | x | x | x | x | x | x | x | x | x | x | x | x | x | x | x |

Table 8. Features selected after the dimensionality reduction steps, for the clinical+DNA+RNA+Digital Pathology model.

| <i>Seeds</i>                    | Logistic Regression |   |   |   |   | Random Forest |   |   |   |   | SVC |   |   |   |   |   |   |
|---------------------------------|---------------------|---|---|---|---|---------------|---|---|---|---|-----|---|---|---|---|---|---|
|                                 | 1                   | 2 | 3 | 4 | 5 | 1             | 2 | 3 | 4 | 5 | 1   | 2 | 3 | 4 | 5 |   |   |
| <b>Tumour size</b>              | x                   | x |   | x | x | x             | x | x | x | x |     |   |   |   | x | x |   |
| <b>Lymph node involvement</b>   | x                   | x | x | x | x | x             | x | x | x | x | x   | x | x | x | x |   |   |
| <b>Age at diagnosis</b>         | x                   | x | x | x | x | x             | x | x | x | x | x   | x | x | x | x |   |   |
| <b>Histological subtype</b>     | x                   | x |   | x | x | x             | x | x | x | x |     |   |   |   | x | x |   |
| <b>HER2 status</b>              | x                   | x |   | x | x | x             | x | x | x | x |     |   |   |   | x | x |   |
| <b>ER status</b>                | x                   | x | x | x | x | x             | x | x | x | x | x   | x | x | x | x |   |   |
| <b>PGR expression</b>           | x                   | x | x | x | x | x             | x | x | x | x | x   | x | x | x | x |   |   |
| <b>ESR1 expression</b>          | x                   | x | x | x | x | x             | x | x | x | x | x   | x | x | x | x |   |   |
| <b>Histological grade</b>       | x                   | x | x | x | x | x             | x | x | x | x | x   | x | x | x | x |   |   |
| <b>Taxane score</b>             | x                   | x | x | x | x | x             | x | x | x | x | x   | x | x | x | x |   |   |
| <b>TMB</b>                      | x                   | x | x | x | x | x             | x | x | x | x | x   | x | x | x | x |   |   |
| <b>PIK3CA mutation status</b>   | x                   | x |   | x | x | x             | x | x | x | x |     |   |   |   | x | x | x |
| <b>TP53 mutation status</b>     | x                   | x | x | x | x | x             | x | x | x | x | x   |   |   |   | x | x | x |
| <b>Chromosomal instability</b>  | x                   | x | x | x | x | x             | x | x | x | x | x   | x | x | x | x |   |   |
| <b>HRD score</b>                | x                   | x | x | x | x | x             | x | x | x | x | x   | x | x | x | x |   |   |
| <b>Neoantigen burden</b>        | x                   | x |   | x | x | x             | x | x | x | x |     |   |   |   | x | x |   |
| <b>STAT1 score</b>              | x                   | x | x | x | x | x             | x | x | x | x | x   | x | x | x | x |   |   |
| <b>Lymphocyte density</b>       | x                   | x | x | x | x | x             | x | x | x | x | x   | x | x | x | x |   |   |
| <b>LOH HLA</b>                  | x                   | x |   | x | x | x             | x | x | x | x |     |   |   |   | x | x |   |
| <b>T-cell dysfunction score</b> |                     |   |   |   |   | x             |   | x | x | x |     |   |   |   |   | x |   |
| <b>T-Cell exclusion score</b>   | x                   | x | x | x | x | x             | x | x | x | x | x   | x | x | x | x |   |   |
| <b>Mast cell score</b>          | x                   | x | x | x | x | x             | x | x | x | x | x   | x | x | x | x |   |   |
| <b>Anthracycline therapy</b>    |                     |   |   | x | x | x             | x | x | x | x |     |   |   |   | x | x |   |
| <b>Taxane first</b>             |                     |   |   |   |   | x             | x | x | x | x |     |   |   |   |   | x |   |
| <b>Taxane second</b>            |                     |   |   |   |   | x             | x | x | x | x |     |   |   |   | x | x |   |
| <b>Number of chemo cycles</b>   |                     | x |   | x | x | x             | x | x | x | x |     |   |   |   | x | x |   |

Table 9. Features selected after the dimensionality reduction steps, for the clinical+DNA+RNA+Digital Pathology+Treatment model.

| Seeds                       | 1      | 2      | 3      | 4      | 5      | Mean   | Std. Dev. |
|-----------------------------|--------|--------|--------|--------|--------|--------|-----------|
| <b>Age at diagnosis</b>     | -0.152 | 0.171  | -0.177 | 0.199  | -0.077 | 49.973 | 116.258   |
| <b>Histological subtype</b> | 0.227  |        | 0.281  |        | 0.109  | 0.891  | 0.097     |
| <b>ER status</b>            | -0.223 | -0.155 | -0.293 | -0.188 | -0.089 | 0.320  | 0.898     |
| <b>Histological grade</b>   | 0.052  | -0.236 | 0.078  | -0.288 | 0.000  | 2.612  | 0.237     |

Table 10. Logistic regression coefficients and scores used to z-score normalize the features, for the model including clinical features.

| Seeds                         | 1      | 2      | 3      | 4      | 5      | Mean   | Std. Dev. |
|-------------------------------|--------|--------|--------|--------|--------|--------|-----------|
| <b>Tumour size</b>            | -0.184 |        | -0.244 | -0.102 | -0.250 | 45.850 | 689.365   |
| <b>Lymph node involvement</b> | -0.149 | 0.132  | -0.162 | -0.124 | -0.170 | 0.048  | 0.998     |
| <b>Age at diagnosis</b>       | 0.173  | 0.146  | 0.188  | 0.136  | 0.210  | 49.973 | 116.258   |
| <b>Histological subtype</b>   | -0.091 |        | -0.372 | 0.000  | -0.382 | 0.891  | 0.097     |
| <b>HER2 status</b>            | 0.330  |        | 0.485  | 0.229  | 0.470  | -0.252 | 0.937     |
| <b>ER status</b>              | 0.102  | -0.265 | 0.110  | 0.054  | 0.136  | 0.320  | 0.898     |
| <b>Histological grade</b>     | 0.282  | 0.153  | 0.519  | 0.127  | 0.509  | 2.612  | 0.237     |
| <b>TMB</b>                    | -0.089 | 0.220  | -0.075 | -0.050 | -0.093 | 96.340 | 6371.299  |
| <b>PIK3CA mutation status</b> | 0.044  |        | 0.090  | 0.009  | 0.120  | 0.259  | 0.192     |
| <b>TP53 mutation status</b>   | 0.202  |        | 0.292  | 0.129  | 0.273  | 0.578  | 0.244     |
| <b>HRD score</b>              | -0.382 | -0.231 | -0.606 | -0.225 | -0.588 | 26.340 | 234.878   |
| <b>Neoantigen burden</b>      | 0.212  |        | 0.261  | 0.161  | 0.291  | 24.619 | 567.270   |
| <b>LOH HLA</b>                | -0.080 |        | -0.073 | -0.046 | -0.099 | 0.177  | 0.146     |

Table 11. Logistic regression coefficients and scores used to z-score normalize the features, for the model including clinical+DNA features.

| Seeds                         | 1      | 2      | 3      | 4      | 5      | Mean      | Std. Dev.   |
|-------------------------------|--------|--------|--------|--------|--------|-----------|-------------|
| <b>Tumour size</b>            | -0.141 | 0.000  | -0.141 |        | -0.075 | 45.850    | 689.365     |
| <b>Lymph node involvement</b> | 0.087  | 0.081  | 0.087  | 0.150  | 0.069  | 0.048     | 0.998       |
| <b>Age at diagnosis</b>       | -0.301 | -0.352 | -0.301 | -0.076 | -0.199 | 49.973    | 116.258     |
| <b>Histological subtype</b>   | 0.177  | 0.171  | 0.177  |        | 0.149  | 0.891     | 0.097       |
| <b>ER status</b>              | -0.134 | -0.150 | -0.134 | 0.070  | -0.086 | 0.320     | 0.898       |
| <b>PGR expression</b>         | 0.111  | 0.163  | 0.111  | -0.086 | 0.028  | 0.973     | 7.114       |
| <b>ESR1 expression</b>        | -0.315 | -0.400 | -0.315 | -0.151 | -0.152 | 3.628     | 7.968       |
| <b>Histological grade</b>     | 0.041  | 0.027  | 0.041  | -0.199 | 0.047  | 2.612     | 0.237       |
| <b>Taxane score</b>           | -0.137 | -0.157 | -0.137 | -0.092 | -0.092 | -0.816    | 1.902       |
| <b>STAT1 score</b>            | -0.039 | -0.058 | -0.039 | -0.230 | 0.000  | 21230.641 | 3702977.558 |
| <b>Mast cell score</b>        | 0.184  | 0.252  | 0.184  | 0.050  | 0.059  | 3.040     | 2.968       |

Table 12. Logistic regression coefficients and scores used to z-score normalize the features, for the model including clinical+RNA features.



| Seeds                           | 1      | 2      | 3      | 4      | 5      | Mean      | Std. Dev.   |
|---------------------------------|--------|--------|--------|--------|--------|-----------|-------------|
| <b>Tumour size</b>              | -0.232 | -0.108 |        | 0.012  | 0.000  | 45.850    | 689.365     |
| <b>Lymph node involvement</b>   | -0.025 | -0.009 | 0.015  | -0.024 | -0.009 | 0.048     | 0.998       |
| <b>Age at diagnosis</b>         | -0.259 | 0.000  | -0.391 | -0.259 | 0.000  | 49.973    | 116.258     |
| <b>HER2 status</b>              | -0.198 | -0.142 |        | -0.229 | -0.108 | -0.252    | 0.937       |
| <b>ER status</b>                | 0.000  | 0.026  | -0.001 | 0.000  | 0.027  | 0.320     | 0.898       |
| <b>PGR expression</b>           | 0.180  | 0.061  | -0.166 | 0.179  | 0.061  | 0.973     | 7.114       |
| <b>ESR1 expression</b>          | -0.499 | -0.228 | -0.471 | -0.498 | -0.228 | 3.628     | 7.968       |
| <b>Histological grade</b>       | 0.173  | 0.077  | 0.102  | 0.172  | 0.077  | 2.612     | 0.237       |
| <b>Taxane score</b>             | -0.255 | -0.117 | -0.248 | -0.256 | -0.117 | -0.816    | 1.902       |
| <b>TMB</b>                      | -0.202 | -0.095 | 0.135  | -0.203 | -0.095 | 96.340    | 6371.299    |
| <b>PIK3CA mutation status</b>   | 0.014  | 0.060  | -0.116 | 0.011  | 0.060  | 0.259     | 0.192       |
| <b>TP53 mutation status</b>     | 0.255  | 0.134  | -0.265 | 0.256  | 0.134  | 0.578     | 0.244       |
| <b>HRD score</b>                | -0.190 | -0.109 | 0.197  | -0.190 | -0.109 | 26.340    | 234.878     |
| <b>Neoantigen burden</b>        | 0.100  | 0.129  |        | 0.102  | 0.129  | 24.619    | 567.270     |
| <b>STAT1 score</b>              | 0.005  | 0.000  | 0.177  | 0.006  | 0.000  | 21230.641 | 3702977.558 |
| <b>T-cell dysfunction score</b> |        |        |        | -0.203 | -0.142 | -0.169    | 0.818       |
| <b>T-Cell exclusion score</b>   | 0.140  | 0.078  | -0.417 | 0.139  | 0.078  | -0.206    | 0.941       |
| <b>Mast cell score</b>          | 0.399  | 0.136  | 0.051  | 0.400  | 0.136  | 3.040     | 2.968       |

Table 13. Logistic regression coefficients and scores used to z-score normalize the features, for the model including clinical+DNA+RNA features.

| Seeds                           | 1      | 2      | 3      | 4      | 5      | Mean      | Std. Dev.   |
|---------------------------------|--------|--------|--------|--------|--------|-----------|-------------|
| <b>Tumour size</b>              | -0.274 | -0.065 |        | -0.284 | -0.080 | 45.850    | 689.365     |
| <b>Lymph node involvement</b>   | -0.208 | 0.000  | 0.155  | -0.735 | -0.058 | 0.048     | 0.998       |
| <b>Age at diagnosis</b>         | 0.108  | 0.073  | 0.000  | 0.296  | 0.090  | 49.973    | 116.258     |
| <b>Histological subtype</b>     | 0.061  | 0.118  | 0.476  | -0.202 | 0.112  | 0.891     | 0.097       |
| <b>HER2 status</b>              | 0.448  | -0.158 |        | -0.406 | -0.194 | -0.252    | 0.937       |
| <b>ER status</b>                | 0.000  | -0.009 | 0.000  | 0.000  | -0.016 | 0.320     | 0.898       |
| <b>PGR expression</b>           | 0.115  | 0.050  | 0.075  | 0.268  | 0.081  | 0.973     | 7.114       |
| <b>ESR1 expression</b>          | -0.426 | -0.211 | -0.383 | -0.828 | -0.289 | 3.628     | 7.968       |
| <b>Histological grade</b>       | 0.000  | 0.000  | 0.006  | 0.058  | 0.000  | 2.612     | 0.237       |
| <b>TMB</b>                      | 0.230  | 0.129  | -0.547 | 0.480  | 0.164  | 96.340    | 6371.299    |
| <b>TP53 mutation status</b>     | 0.000  | 0.020  | 0.000  | -0.350 | 0.000  | 0.578     | 0.244       |
| <b>Chromosomal instability</b>  | 0.120  | 0.066  | -0.063 | 0.197  | 0.091  | 0.354     | 0.029       |
| <b>HRD score</b>                | -0.165 | -0.105 | 0.000  | -0.252 | -0.130 | 26.340    | 234.878     |
| <b>Neoantigen burden</b>        | -0.041 | 0.000  |        | -0.284 | 0.000  | 24.619    | 567.270     |
| <b>STAT1 score</b>              | 0.000  | 0.000  | -0.176 | 0.019  | -0.004 | 21230.641 | 3702977.558 |
| <b>T-cell dysfunction score</b> |        | 0.230  |        | 0.972  | 0.301  | -0.169    | 0.818       |
| <b>Mast cell score</b>          | 0.400  | 0.145  | -0.191 | 0.857  | 0.231  | 3.040     | 2.968       |

Table 14. Logistic regression coefficients and scores used to z-score normalize the features, for the model including clinical+DNA+RNA+Digital Pathology features.

| <i>Seeds</i>                   | <b>1</b> | <b>2</b> | <b>3</b> | <b>4</b> | <b>5</b> | <b>Mean</b> | <b>Std. Dev.</b> |
|--------------------------------|----------|----------|----------|----------|----------|-------------|------------------|
| <b>Tumour size</b>             | -0.326   | -0.155   |          | -0.390   | -0.168   | 45.850      | 689.365          |
| <b>Age at diagnosis</b>        | 0.116    | 0.070    | 0.121    | 0.220    | 0.032    | 49.973      | 116.258          |
| <b>Histological subtype</b>    | 0.020    | 0.117    |          | -0.055   | 0.097    | 0.891       | 0.097            |
| <b>HER2 status</b>             | 0.527    | 0.231    |          | 0.912    | 0.280    | -0.252      | 0.937            |
| <b>ER status</b>               | 0.000    | -0.007   | 0.062    | 0.066    | 0.000    | 0.320       | 0.898            |
| <b>PGR expression</b>          | 0.128    | 0.051    | -0.128   | 0.202    | 0.001    | 0.973       | 7.114            |
| <b>ESR1 expression</b>         | -0.490   | -0.208   | -0.287   | -0.727   | -0.212   | 3.628       | 7.968            |
| <b>Histological grade</b>      | 0.000    | 0.000    | 0.003    | 0.058    | 0.000    | 2.612       | 0.237            |
| <b>TMB</b>                     | 0.266    | 0.131    | -0.161   | 0.499    | 0.128    | 96.340      | 6371.299         |
| <b>TP53 mutation status</b>    | 0.000    | 0.019    | 0.294    | -0.342   | 0.000    | 0.578       | 0.244            |
| <b>Chromosomal instability</b> | 0.132    | 0.065    | 0.133    | 0.141    | 0.034    | 0.354       | 0.029            |
| <b>HRD score</b>               | -0.176   | -0.108   | 0.103    | -0.273   | -0.087   | 26.340      | 234.878          |
| <b>Neoantigen burden</b>       | -0.006   | -0.063   |          | -0.130   | -0.016   | 24.619      | 567.270          |
| <b>STAT1 score</b>             | 0.000    | 0.000    | -0.264   | 0.055    | 0.000    | 21230.641   | 3702977.558      |
| <b>Mast cell score</b>         | 0.486    | 0.145    | 0.026    | 0.804    | 0.135    | 3.040       | 2.968            |
| <b>Anthracycline therapy</b>   |          |          |          | -0.234   | 0.000    | 0.918       | 0.075            |
| <b>Number of chemo cycles</b>  |          | 0.039    |          | 0.373    | 0.000    | 5.925       | 0.450            |

Table 15. Logistic regression coefficients and scores used to z-score normalize the features, for the model including clinical+DNA+RNA+Digital Pathology+Treatment features.
